# Supplementary material for: The Effect of Zoledronic Acid on Serum Biomarkers among Patients with Chronic Low Back Pain and Modic Changes in Lumbar Magnetic Resonance Imaging
Source: MDPI journal article supplement (doi:10.3390/diagnostics9040212), 2019-12-04
Supplement: s1 [file s1]

**Table S1.** Median concentrations and interquartile range (IQR) of serum biomarkers at baseline, one month and one year according to type of Modic changes (M1-dominant (M1) or M2-dominant (M2) P<sup>1</sup> shows the significance of the change in each respective biomarker concentration from baseline to one month or from baseline to one year, separately for M1 and M2 lesions. P<sup>2</sup> shows the significance of the difference in change from baseline to one month or from baseline to one year in the concentration of each biomarker between the patients with M1 and M2 types. Significant *p*-values are bolded.

| Serum Biomarkers       | Baseline<br>Median (IQR) | 1 Month<br>Median (IQR) | P <sup>1</sup> | P <sup>2</sup> | 1 Year<br>Median (IQR) | P <sup>1</sup>   | P <sup>2</sup> |
|------------------------|--------------------------|-------------------------|----------------|----------------|------------------------|------------------|----------------|
| <b>Bone panel</b>      |                          |                         |                |                |                        |                  |                |
| AFOS (U/L)             |                          |                         |                | 0.080          |                        |                  | <b>0.003</b>   |
| M1                     | 67 (59, 79)              | 65 (57, 76)             | 0.386          |                | 56 (53, 66)            | <b>0.001</b>     |                |
| M2                     | 64 (51, 85)              | 71 (60, 87)             | 0.142          |                | 67 (54, 91)            | 0.403            |                |
| RANKL (pg/mL)          |                          |                         |                | <b>0.041</b>   |                        |                  | 0.522          |
| M1                     | 9.5 (0.0, 37.0)          | 0.0 (0.0, 42.8)         | 0.369          |                | 9.5 (0.0, 45.6)        | 0.498            |                |
| M2                     | 19.2 (0.0, 66.9)         | 19.2 (6.5, 87.1)        | 0.084          |                | 19.2 (0.0, 57.8)       | 0.672            |                |
| iPINP (ng/mL)          |                          |                         |                | <b>0.014</b>   |                        |                  | <b>0.003</b>   |
| M1                     | 38 (27, 50)              | 30 (21, 40)             | <b>0.001</b>   |                | 18 (14, 35)            | <b>&lt;0.001</b> |                |
| M2                     | 33 (25, 39)              | 36 (24, 41)             | 0.787          |                | 37 (18, 44)            | 0.685            |                |
| CTX-1 (pg/mL)          |                          |                         |                | >0.999         |                        |                  | 0.732          |
| M1                     | 0.3 (0.2, 0.5)           | 0.1 (0.0, 3.4)          | 0.515          |                | 0.2 (0.1, 4.7)         | 0.714            |                |
| M2                     | 0.2 (0.1, 0.4)           | 0.1 (0.0, 0.3)          | <b>0.027</b>   |                | 0.2 (0.1, 0.3)         | 0.893            |                |
| <b>Chemokine panel</b> |                          |                         |                |                |                        |                  |                |
| Eotaxin-1 (pg/mL)      |                          |                         |                | 0.197          |                        |                  | 0.159          |
| M1                     | 178 (147, 256)           | 191 (140, 241)          | 0.594          |                | 179 (143, 233)         | 0.485            |                |
| M2                     | 170 (139, 252)           | 197 (153, 218)          | 0.305          |                | 190 (169, 244)         | 0.305            |                |
| Eotaxin-3 (pg/mL)      |                          |                         |                | 0.331          |                        |                  | 0.441          |
| M1                     | 19.5 (14.8, 26.2)        | 16.4 (11.8, 28.1)       | <b>0.034</b>   |                | 17.7 (10.9, 27.0)      | 0.155            |                |
| M2                     | 17.0 (10.4, 23.2)        | 17.9 (9.2, 20.8)        | 0.588          |                | 14.3 (12.5, 22.1)      | > 0.999          |                |
| IP-10 (pg/mL)          |                          |                         |                | 0.493          |                        |                  | <b>0.025</b>   |
| M1                     | 247 (188, 297)           | 248 (205, 296)          | 0.129          |                | 265 (209, 372)         | <b>0.044</b>     |                |
| M2                     | 303 (212, 464)           | 356 (213, 446)          | 0.893          |                | 279 (205, 371)         | 0.168            |                |
| MIP-1A (pg/mL)         |                          |                         |                | 0.227          |                        |                  | 0.728          |
| M1                     | 5.3 (5.3, 20.0)          | 5.3 (5.3, 17.1)         | 0.639          |                | 11.6 (5.3, 17.7)       | 0.602            |                |
| M2                     | 5.3 (5.3, 20.1)          | 18.4 (5.3, 21.0)        | 0.557          |                | 10.7 (5.3, 19.0)       | 0.910            |                |
| MIP-1B (pg/mL)         |                          |                         |                | 0.100          |                        |                  | 0.512          |
| M1                     | 110 (68, 154)            | 96 (66, 133)            | <b>0.036</b>   |                | 99 (66, 157)           | 0.578            |                |
| M2                     | 115 (73, 154)            | 122 (89, 156)           | 0.588          |                | 114 (77, 169)          | 0.735            |                |
| MCP-1 (pg/mL)          |                          |                         |                | 0.151          |                        |                  | 0.303          |
| M1                     | 256 (213, 298)           | 256 (208, 308)          | 0.427          |                | 267 (209, 323)         | 0.804            |                |
| M2                     | 245 (216, 335)           | 293 (245, 356)          | 0.168          |                | 300 (230, 345)         | 0.191            |                |
| MCP-4 (pg/mL)          |                          |                         |                | <b>0.012</b>   |                        |                  | <b>0.031</b>   |
| M1                     | 148 (109, 179)           | 132 (110, 164)          | <b>0.023</b>   |                | 132 (105, 176)         | 0.413            |                |
| M2                     | 122 (105, 177)           | 148 (129, 208)          | 0.094          |                | 156 (122, 210)         | 0.080            |                |
| MDC-1 (ng/mL)          |                          |                         |                | 0.094          |                        |                  | 0.073          |
| M1                     | 1.1 (0.9, 1.3)           | 1.0 (0.9, 1.2)          | 0.348          |                | 1.0 (0.8, 1.2)         | 0.123            |                |
| M2                     | 1.0 (0.7, 1.4)           | 1.0 (0.8, 1.6)          | <b>0.048</b>   |                | 1.1 (0.7, 1.6)         | 0.305            |                |
| RANTES (ng/mL)         |                          |                         |                | 0.113          |                        |                  | 0.197          |
| M1                     | 102 (59, 218)            | 85 (43, 134)            | <b>0.010</b>   |                | 84 (61, 143)           | 0.117            |                |
| M2                     | 69 (34, 88)              | 76 (48, 104)            | 0.893          |                | 75 (62, 92)            | 0.685            |                |
| TARC (pg/mL)           |                          |                         |                | <b>0.007</b>   |                        |                  | <b>0.004</b>   |
| M1                     | 295 (180, 432)           | 270 (168, 369)          | 0.269          |                | 288 (170, 389)         | 0.427            |                |
| M2                     | 267 (153, 367)           | 290 (235, 466)          | <b>0.013</b>   |                | 337 (214, 449)         | 0.002            |                |
| MIG-1 (pg/mL)          |                          |                         |                | 0.983          |                        |                  | 0.051          |
| M1                     | 72 (28, 119)             | 83 (28, 119)            | 0.924          |                | 72 (47, 118)           | 0.090            |                |
| M2                     | 72 (56, 110)             | 72 (65, 162)            | 0.910          |                | 72 (23, 101)           | 0.156            |                |
| <b>Cytokine panel</b>  |                          |                         |                |                |                        |                  |                |
| IL-7 (pg/mL)           |                          |                         |                | 0.240          |                        |                  | 0.690          |
| M1                     | 18.6 (15.2, 22.8)        | 15.9 (11.7, 19.7)       | 0.055          |                | 16.5 (12.3, 20.4)      | 0.062            |                |
| M2                     | 19.4 (12.9, 23.8)        | 17.5 (13.1, 24.1)       | 0.893          |                | 14.5 (12.2, 18.7)      | 0.127            |                |
| IL-12/23p40 (pg/mL)    |                          |                         |                | 0.932          |                        |                  | 0.135          |
| M1                     | 105 (86, 148)            | 110 (83, 164)           | 0.897          |                | 117 (90, 150)          | 0.500            |                |

|                           |                   |                   |         |                   |        |       |
|---------------------------|-------------------|-------------------|---------|-------------------|--------|-------|
| M2                        | 117 (82, 152)     | 101 (87, 163)     | 0.893   | 98 (81, 145)      | 0.168  |       |
| IL-15 (pg/mL)             |                   |                   |         | 0.177             |        | 0.424 |
| M1                        | 3.0 (2.5, 3.3)    | 2.9 (2.4, 3.3)    | 0.878   | 3.0 (2.6, 3.3)    | 0.750  |       |
| M2                        | 2.7 (2.3, 3.2)    | 2.9 (2.5, 3.5)    | 0.048   | 2.9 (2.6, 3.2)    | 0.216  |       |
| IL-16 (pg/mL)             |                   |                   |         | 0.228             |        | 0.798 |
| M1                        | 187 (161, 226)    | 202 (167, 209)    | 0.689   | 201 (161, 234)    | 0.953  |       |
| M2                        | 161 (146, 229)    | 196 (176, 223)    | 0.305   | 173 (140, 214)    | 0.376  |       |
| IL-17A (pg/mL)            |                   |                   |         | 0.083             |        | 0.864 |
| M1                        | 2.3 (1.5, 3.1)    | 2.3 (1.4, 3.0)    | 0.768   | 2.4 (1.5, 3.5)    | 0.842  |       |
| M2                        | 2.3 (1.6, 3.5)    | 2.6 (2.1, 4.1)    | 0.110   | 2.2 (1.5, 3.5)    | 0.787  |       |
| TNF-B (pg/mL)             |                   |                   |         | 0.689             |        | 0.312 |
| M1                        | 0.4 (0.1, 0.5)    | 0.3 (0.1, 0.5)    | 0.472   | 0.3 (0.1, 0.6)    | 0.293  |       |
| M2                        | 0.1 (0.1, 0.4)    | 0.1 (0.1, 0.4)    | 0.938   | 0.1 (0.1, 0.3)    | 0.508  |       |
| Anti-inflammatory panel   |                   |                   |         |                   |        |       |
| IL-1sRII (ng/mL)          |                   |                   |         | 0.323             |        | 0.649 |
| M1                        | 22.9 (19.8, 28.1) | 21.4 (17.7, 26.4) | 0.123   | 23.2 (19.3, 26.2) | 0.079  |       |
| M2                        | 24.1 (21.1, 27.2) | 24.5 (19.9, 27.3) | > 0.999 | 25.0 (19.6, 28.6) | 0.946  |       |
| Pro-inflammatory panel    |                   |                   |         |                   |        |       |
| IFN-A (pg/mL)             |                   |                   |         | 0.291             |        | 0.926 |
| M1                        | 66 (55, 79)       | 66 (55, 79)       | 0.856   | 66 (55, 100)      | 0.328  |       |
| M2                        | 66 (38, 79)       | 76 (50, 97)       | 0.258   | 76 (55, 79)       | 0.313  |       |
| IFN-G (pg/mL)             |                   |                   |         | 0.376             |        | 0.317 |
| M1                        | 4.7 (3.3, 6.6)    | 4.8 (3.1, 7.7)    | 0.859   | 5.1 (3.1, 7.4)    | 0.786  |       |
| M2                        | 5.9 (4.6, 14.4)   | 4.7 (4.4, 18.7)   | 0.414   | 4.4 (3.4, 8.8)    | 0.244  |       |
| IL-2R (pg/mL)             |                   |                   |         | 0.300             |        | 0.633 |
| M1                        | 119 (95, 177)     | 109 (94, 177)     | 0.817   | 130 (95, 150)     | 0.812  |       |
| M2                        | 153 (95, 229)     | 164 (125, 229)    | 0.233   | 116 (88, 218)     | 0.377  |       |
| IL-6 (pg/mL)              |                   |                   |         | 0.711             |        | 0.073 |
| M1                        | 0.6 (0.4, 0.8)    | 0.6 (0.4, 0.9)    | 0.804   | 0.6 (0.5, 0.8)    | 0.714  |       |
| M2                        | 0.9 (0.6, 1.1)    | 0.8 (0.5, 1.7)    | 0.635   | 0.6 (0.5, 0.9)    | 0.057  |       |
| IL-8 (pg/mL)              |                   |                   |         | 0.360             |        | 0.568 |
| M1                        | 10.6 (8.4, 12.2)  | 10.3 (7.9, 12.9)  | 0.100   | 10.1 (7.6, 13.2)  | 0.400  |       |
| M2                        | 9.6 (6.8, 15.5)   | 8.2 (6.4, 12.0)   | 0.110   | 8.3 (6.6, 10.2)   | 0.244  |       |
| TNF-A (pg/mL)             |                   |                   |         | 0.303             |        | 0.568 |
| M1                        | 1.9 (1.3, 2.2)    | 1.7 (1.4, 2.3)    | 0.258   | 1.8 (1.3, 2.3)    | 0.915  |       |
| M2                        | 2.0 (1.3, 2.3)    | 2.1 (1.7, 2.1)    | 0.735   | 1.6 (1.3, 2.7)    | 0.542  |       |
| COMP (U/L)                |                   |                   |         | 0.544             |        | 0.938 |
| M1                        | 11.2 (8.9, 12.1)  | 10.1 (8.6, 12.4)  | 0.377   | 10.9 (8.4, 13.3)  | 0.542  |       |
| M2                        | 10.8 (8.8, 13.7)  | 11.0 (9.7, 13.7)  | 0.946   | 10.1 (9.1, 13.8)  | 0.700  |       |
| Angiogenesis panel        |                   |                   |         |                   |        |       |
| VEGF (pg/mL) <sup>3</sup> |                   |                   |         | 0.168             |        | 0.955 |
| M1, M1/2-1                | 134 (60, 181)     | 116 (56, 200)     | 0.279   | 97 (59, 204)      | 0.500  |       |
| M2, M1/2-2                | 93 (51, 228)      | 104 (64, 229)     | 0.273   | 108 (62, 226)     | >0.999 |       |
| VEGF-A (pg/mL)            |                   |                   |         | 0.669             |        | 0.493 |
| M1                        | 299 (164, 470)    | 309 (134, 467)    | 0.427   | 266 (138, 436)    | 0.679  |       |
| M2                        | 306 (98, 608)     | 215 (152, 465)    | 0.273   | 352 (109, 485)    | 0.735  |       |
| VEGF-C (pg/mL)            |                   |                   |         | 0.252             |        | 0.127 |
| M1                        | 395 (374, 523)    | 396 (334, 502)    | 0.194   | 389 (336, 514)    | 0.662  |       |
| M2                        | 406 (334, 494)    | 479 (344, 529)    | 0.685   | 473 (341, 562)    | 0.048  |       |
| VEGF-D (ng/mL)            |                   |                   |         | 0.493             |        | 0.588 |
| M1                        | 0.7 (0.7, 0.9)    | 0.7 (0.6, 1.0)    | 0.470   | 0.8 (0.6, 0.9)    | 0.400  |       |
| M2                        | 0.7 (0.6, 0.9)    | 0.6 (0.6, 0.9)    | 0.273   | 0.6 (0.6, 0.8)    | 0.080  |       |
| Tie-2 (ng/mL)             |                   |                   |         | 0.317             |        | 0.094 |
| M1                        | 4.5 (4.2, 5.3)    | 4.5 (3.7, 5.2)    | 0.239   | 4.7 (3.7, 4.9)    | 0.028  |       |
| M2                        | 4.1 (3.9, 5.1)    | 4.5 (3.4, 5.5)    | 0.588   | 4.2 (3.8, 4.9)    | 0.839  |       |
| Flt-1 (pg/mL)             |                   |                   |         | 0.648             |        | 0.493 |
| M1                        | 88 (74, 99)       | 87 (76, 98)       | 0.455   | 89 (78, 112)      | 0.915  |       |
| M2                        | 93 (78, 97)       | 83 (64, 122)      | > 0.999 | 86 (77, 96)       | 0.191  |       |
| bFGF (pg/mL)              |                   |                   |         | 0.842             |        | 0.977 |
| M1                        | 4.7 (2.2, 6.8)    | 3.8 (2.8, 7.6)    | 0.628   | 4.3 (3.0, 9.2)    | 0.324  |       |
| M2                        | 3.2 (1.2, 4.9)    | 2.9 (2.1, 3.9)    | 0.635   | 3.9 (2.1, 7.7)    | 0.216  |       |
| HGF-1 (pg/mL)             |                   |                   |         | 0.882             |        | 0.932 |
| M1                        | 154 (108, 235)    | 154 (86, 223)     | 0.392   | 171 (86, 223)     | 0.784  |       |
| M2                        | 212 (86, 235)     | 166 (114, 295)    | 0.926   | 212 (94, 283)     | >0.999 |       |
| Vascular injury panel     |                   |                   |         |                   |        |       |



|                              |             |       |             |       |             |             |
|------------------------------|-------------|-------|-------------|-------|-------------|-------------|
| IFN-A                        | 0.33        | 0.02  | 0.43        | 0.00  | -0.11       | -0.11       |
| IFN-G                        | 0.05        | 0.21  | -0.20       | 0.11  | 0.20        | -0.09       |
| IL-2R                        | 0.09        | 0.43  | -0.26       | 0.35  | 0.23        | -0.27       |
| IL-6                         | -0.08       | 0.13  | -0.28       | 0.00  | 0.26        | 0.00        |
| IL-8                         | 0.22        | -0.07 | 0.05        | -0.44 | 0.10        | <b>0.66</b> |
| TNF-A                        | -0.11       | -0.02 | -0.32       | 0.04  | 0.02        | -0.15       |
| <b>Angiogenesis panel</b>    |             |       |             |       |             |             |
| VEGF-A                       | 0.34        | 0.30  | 0.04        | 0.07  | <b>0.45</b> | 0.20        |
| VEGF-C                       | 0.17        | 0.13  | 0.30        | -0.09 | -0.12       | 0.14        |
| VEGF-D                       | 0.14        | 0.35  | 0.03        | -0.12 | 0.19        | 0.43        |
| Tie-2                        | <b>0.51</b> | -0.20 | <b>0.48</b> | -0.10 | 0.11        | -0.09       |
| Flt-1                        | 0.29        | 0.00  | 0.22        | -0.27 | 0.20        | <b>0.47</b> |
| bFGF                         | 0.00        | -0.18 | -0.13       | 0.09  | 0.22        | -0.30       |
| HGF-1                        | 0.09        | -0.02 | <b>0.47</b> | -0.03 | -0.37       | 0.00        |
| <b>Vascular injury panel</b> |             |       |             |       |             |             |
| hs-CRP                       | 0.10        | 0.25  | -0.23       | 0.12  | 0.42        | -0.08       |
| ICAM-1                       | 0.29        | -0.03 | 0.30        | 0.11  | 0.07        | -0.14       |
| VCAM-1                       | 0.15        | -0.11 | 0.17        | 0.05  | 0.10        | -0.12       |
| SAA                          | -0.13       | 0.00  | -0.37       | 0.03  | 0.28        | -0.21       |

AFOS = alkaline phosphatase, bFGF = basic fibroblast growth factor beta, CTX1 = C telopeptide of type I collagen, Flt = fms related tyrosine kinase (=VEGFR1), HGF = hepatocyte growth factor, hs-CRP = high-sensitive C-reactive protein, ICAM = intercellular adhesion molecule, IL = interleukin, IFN = interferon, IP = interferon- $\gamma$ -inducible protein, iPINP = intact procollagen I N-terminal propeptide, MCP = monocyte chemotactic protein, MDC = macrophage derived chemokine, MIG = monokine induced by gamma-interferon, MIP = macrophage inflammatory protein, RANKL = receptor activator of NF- $\kappa$ B ligand, RANTES = regulated upon activation, normally T-expressed, and presumably secreted, SAA = serum amyloid A, TARC = thymus and activation-regulated chemokine, Tie = TEK receptor tyrosine kinase, TNF = tumor necrosis factor, VCAM = vascular cell adhesion molecule, VEGF = vascular endothelial growth factor.

**Table S3.** Spearman's correlation coefficients between change in low back pain intensity (VAS) at one month and one year and concentrations of serum biomarkers according to intervention: zoledronic acid (ZA) or placebo infusion. Significant changes bolded. Positive correlation values note higher biomarker concentration with higher LBP intensity (VAS).

|                         | Change in LBP (VAS) |       | Change in LBP (VAS) |       |
|-------------------------|---------------------|-------|---------------------|-------|
|                         | 1 Month             |       | 1 Year              |       |
|                         | Placebo             | ZA    | Placebo             | ZA    |
| <b>Bone panel</b>       |                     |       |                     |       |
| AFOS                    | -0.36               | 0.16  | -0.03               | -0.39 |
| RANKL                   | -0.33               | 0.14  | 0.25                | -0.22 |
| iPINP                   | -0.01               | 0.12  | -0.01               | -0.10 |
| CTX-1                   | 0.33                | 0.29  | -0.41               | 0.01  |
| <b>Chemokines panel</b> |                     |       |                     |       |
| Eotaxin-1               | 0.52                | 0.08  | 0.26                | 0.01  |
| Eotaxin-3               | 0.33                | 0.43  | 0.24                | 0.04  |
| IP-10                   | 0.02                | 0.25  | -0.27               | 0.04  |
| MIP-1A                  | -0.28               | -0.49 | -0.06               | -0.02 |
| MIP-1B                  | -0.23               | 0.34  | 0.15                | 0.30  |
| MCP-1                   | 0.10                | 0.04  | 0.32                | 0.13  |
| MCP-4                   | 0.45                | 0.07  | 0.41                | 0.18  |
| MDC-1                   | 0.10                | 0.47  | 0.24                | -0.06 |
| RANTES                  | 0.12                | 0.55  | 0.01                | -0.01 |
| TARC                    | 0.15                | 0.42  | 0.26                | 0.33  |

|                                |       |       |       |       |
|--------------------------------|-------|-------|-------|-------|
| MIG-1                          | -0.14 | 0.18  | -0.20 | -0.11 |
| <b>Cytokine panel</b>          |       |       |       |       |
| IL-7                           | 0.03  | 0.01  | -0.20 | -0.14 |
| IL-12/23p40                    | 0.08  | 0.39  | -0.38 | 0.07  |
| IL-15                          | 0.11  | 0.15  | 0.06  | 0.03  |
| IL-16                          | 0.19  | 0.19  | 0.00  | -0.09 |
| IL-17A                         | -0.01 | 0.29  | -0.04 | -0.07 |
| TNF-B                          | 0.09  | 0.45  | 0.08  | 0.13  |
| <b>Anti-inflammatory panel</b> |       |       |       |       |
| IL-1sRII                       | -0.08 | 0.28  | 0.06  | 0.04  |
| <b>Pro-inflammatory panel</b>  |       |       |       |       |
| IFN-A                          | 0.20  | -0.18 | -0.08 | -0.13 |
| IFN-G                          | -0.31 | -0.24 | 0.28  | -0.22 |
| IL-2R                          | -0.28 | 0.26  | 0.00  | -0.22 |
| IL-6                           | -0.08 | 0.09  | -0.03 | -0.36 |
| IL-8                           | 0.07  | 0.26  | 0.10  | 0.07  |
| TNF-A                          | -0.27 | 0.01  | -0.04 | -0.07 |
| <b>Angiogenesis panel</b>      |       |       |       |       |
| VEGF-A                         | -0.21 | 0.07  | 0.07  | -0.19 |
| VEGF-C                         | 0.22  | 0.41  | 0.37  | 0.09  |
| VEGF-D                         | -0.24 | -0.12 | -0.22 | -0.45 |
| Tie-2                          | 0.37  | 0.25  | 0.29  | -0.12 |
| Flt-1                          | -0.33 | 0.32  | -0.15 | -0.31 |
| bFGF                           | 0.00  | 0.01  | 0.23  | 0.22  |
| HGF-1                          | 0.12  | 0.03  | 0.22  | 0.00  |
| <b>Vascular injury panel</b>   |       |       |       |       |
| hs-CRP                         | -0.12 | -0.05 | -0.49 | -0.22 |
| ICAM-1                         | 0.03  | -0.06 | 0.26  | 0.16  |
| VCAM-1                         | -0.07 | 0.04  | 0.32  | 0.27  |
| SAA                            | -0.01 | 0.08  | -0.25 | -0.12 |

AFOS = alkaline phosphatase, bFGF = basic fibroblast growth factor beta, CTX1 = C telopeptide of type I collagen, Flt =fms related tyrosine kinase (=VEGFR1), HGF = hepatocyte growth factor, hs-CRP = high-sensitive C-reactive protein, ICAM = intercellular adhesion molecule, IL = interleukin, IFN = interferon, IP = interferon- $\gamma$ -inducible protein, iPINP = intact procollagen I N-terminal propeptide, MCP = monocyte chemotactic protein, MDC = macrophage derived chemokine, MIG = monokine induced by gamma-interferon, MIP = macrophage inflammatory protein, RANKL = receptor activator of NF- $\kappa$ B ligand, RANTES = regulated upon activation, normally T-expressed, and presumably secreted, SAA = serum amyloid A, TARC = thymus and activation-regulated chemokine, Tie = TEK receptor tyrosine kinase, TNF = tumor necrosis factor, VCAM = vascular cell adhesion molecule, VEGF = vascular endothelial growth factor.
